# Supplementary material
Source: PubMed Central journal article supplement (PMC9253789)
Supplement: EMBR-23-e54992-s005.pdf [file EMBR-23-e54992-s005.pdf]

## Expanded View Figures

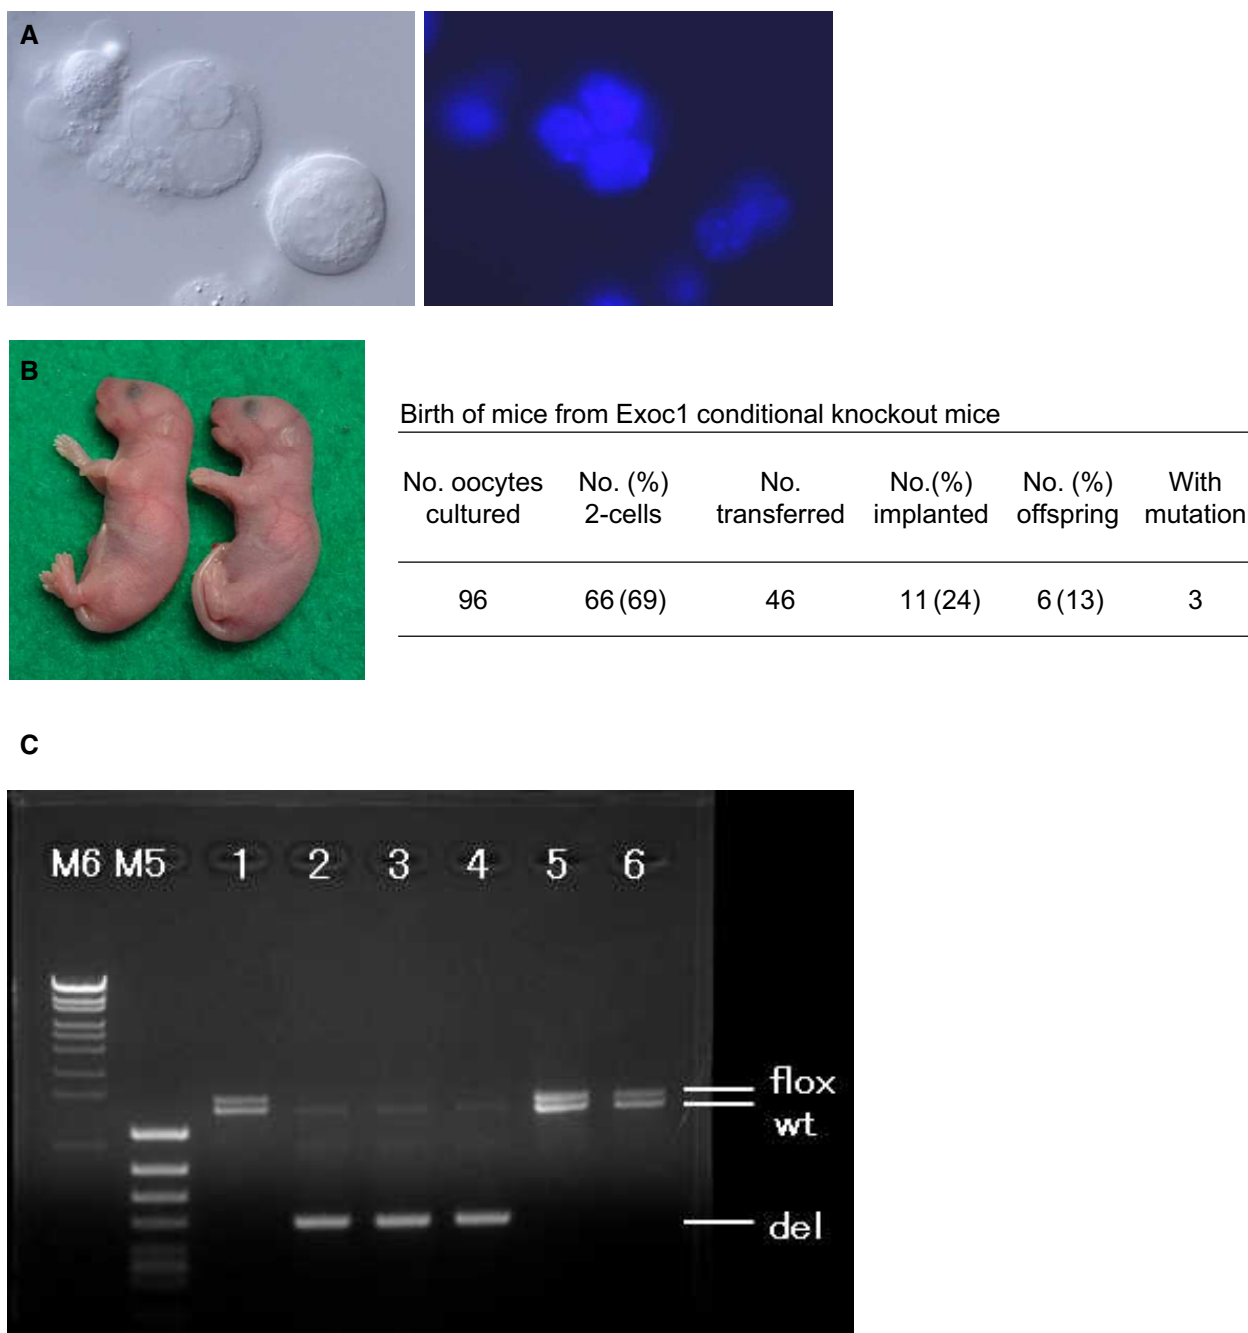

**Figure EV1. Birth of mice following injection of oocytes with primary spermatocytes collected from germline-specific *Exoc1*-knockout mice.**

A Multinucleated cells (syncytial spermatocytes) obtained from an *Exoc1*-knockout male mouse. Each multinucleated cell contained 2–4 spermatocyte nuclei. Differential interference contrast microscopy (left) and Hoechst-staining (right) images. Bar = 10  $\mu$ m.

B Mice born from *Exoc1*-knockout spermatocytes.

C Polymerase chain reaction analysis in mice born from *Exoc1*-knockout spermatocytes. Mice #2, #3, and #4 carried the *Exoc1*-knockout allele (del) while mice #1, #5, and #6 did not. Three pups that did not carry the *Exoc1* mutation were most likely derived from spermatogonia that escaped the Cre-induced *Exoc1* deletion. The expected amplicon sizes are as follows: flox allele, 1,426 bp; wild type allele, 1,291 bp; deletion allele, 490 bp.

(40,XX)

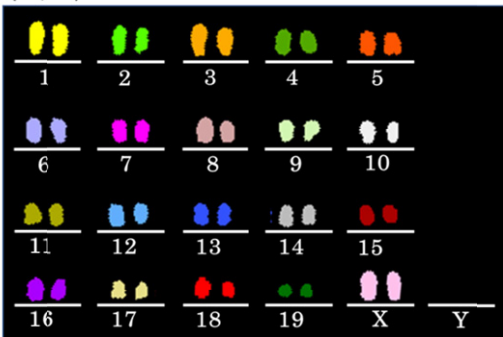

Normal female

(39,X)

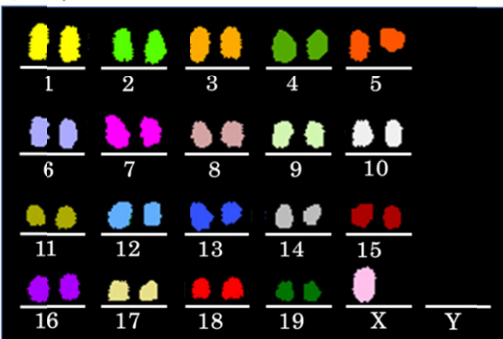

XO female

(40,XX [one shortened X])

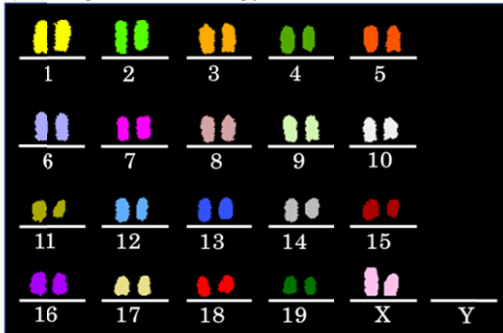

XX female with a partially deleted X chromosome

(40,XY)

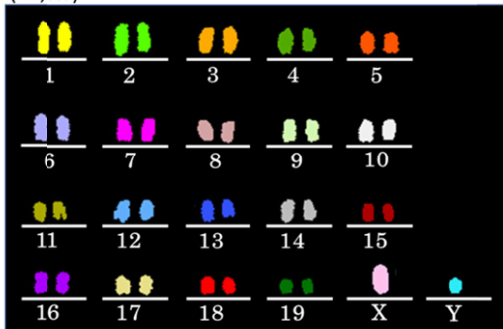

Normal male

**Figure EV2. Chromosomal multicolor FISH analysis of the offspring derived from *Stx2*-deficient spermatocytes.**

No abnormalities were found in autosomes, but there were two cases of sex chromosomal abnormalities.

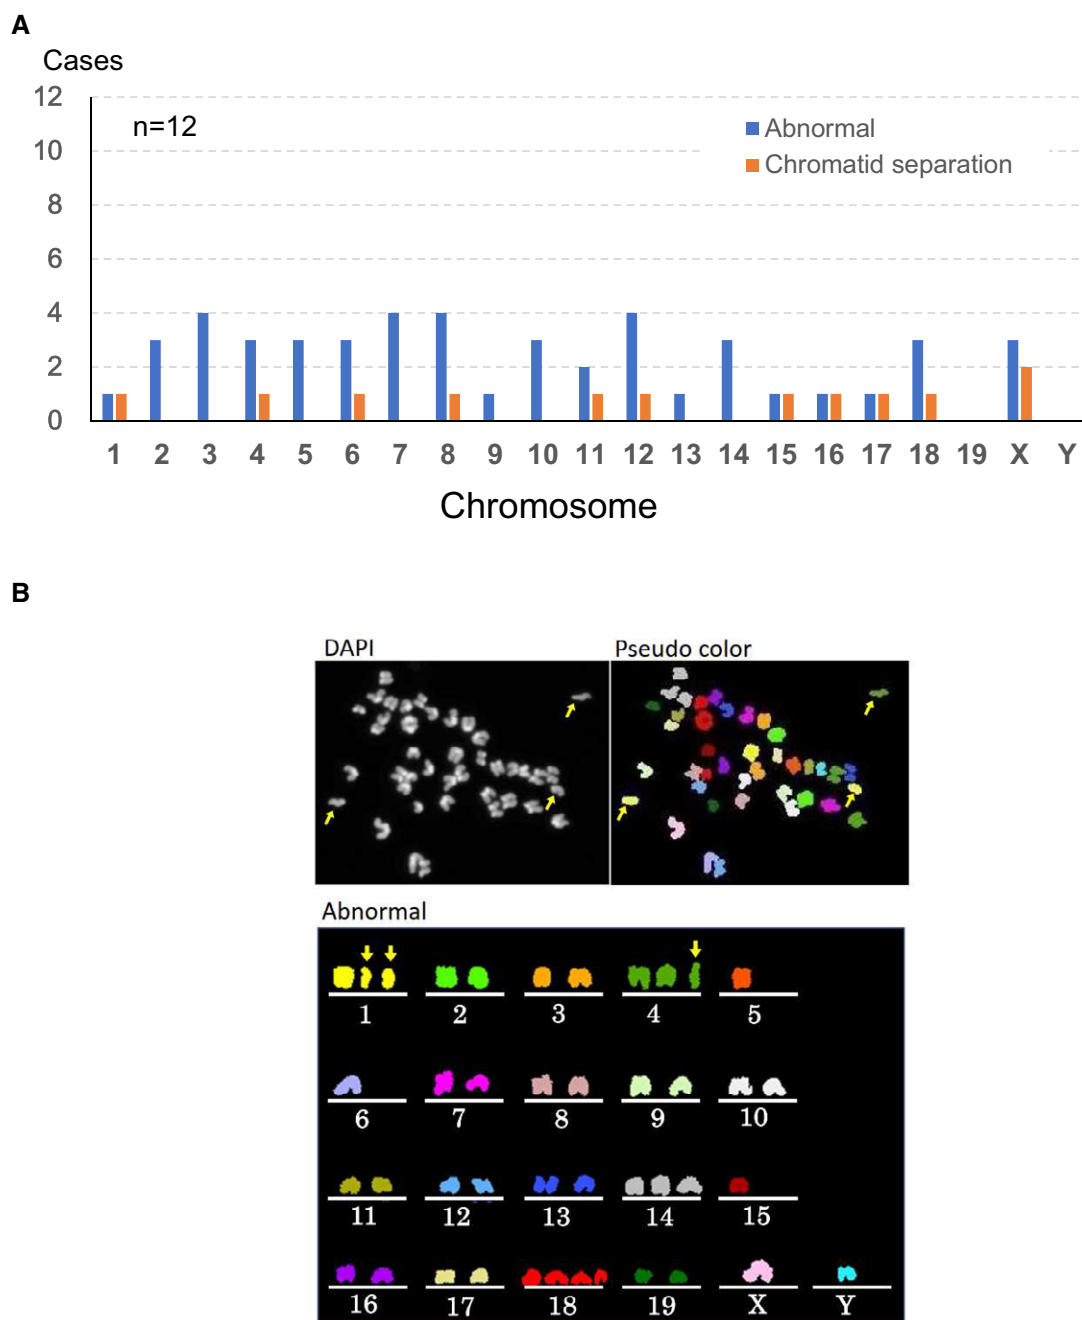

**Figure EV3. Chromosomal multicolor FISH analysis of MII oocytes derived from spermatocyte injection.**

A Chromosomal abnormalities were found in both autosomes and sex chromosomes.

B A representative image of an oocyte with chromosomal aberrations. Arrows indicate prematurely separated chromatids. Besides them, chromosomes 5, 6, 14, 15 and 18 were numerically abnormal.
